# Supplementary material for: Acute Upper Airway Disease in Children With the Omicron (B.1.1.529) Variant of SARS-CoV-2—A Report From the US National COVID Cohort Collaborative
Source: PubMed Central journal article supplement (PMC9012983; doi:10.1001/jamapediatrics.2022.1110), 2022-04-15
Supplement: jamapediatr-e221110-s001.pdf [file jamapediatr-e221110-s001.pdf]

## Supplemental Online Content

Martin B, DeWitt PE, Russell S, et al. Acute upper airway disease in children with the Omicron (B.1.1.529) variant of SARS-CoV-2—a report from the US National COVID Cohort Collaborative. *JAMA Pediatr*. Published online April 15, 2022. doi:10.1001/jamapediatrics.2022.1110

**eTable.** Included diagnoses

This supplemental material has been provided by the authors to give readers additional information about their work.

**eTable.** Included diagnoses

| Concept Name                                    | Concept Code | Concept Id | Domain Id | Vocabulary Id | Concept Class Id | Standard Concept |
|-------------------------------------------------|--------------|------------|-----------|---------------|------------------|------------------|
| Acute bacterial epiglottitis                    | 21060003     | 4050381    | Condition | SNOMED        | Clinical Finding | S                |
| Acute epiglottitis                              | 29608009     | 4105773    | Condition | SNOMED        | Clinical Finding | S                |
| Acute epiglottitis (non-streptococcal)          | 266337001    | 4141503    | Condition | SNOMED        | Clinical Finding | S                |
| Acute epiglottitis with obstruction             | 222008       | 433513     | Condition | SNOMED        | Clinical Finding | S                |
| Acute epiglottitis without obstruction          | 49908003     | 435840     | Condition | SNOMED        | Clinical Finding | S                |
| Acute fibrinous laryngotracheobronchitis        | 275495004    | 4170141    | Condition | SNOMED        | Clinical Finding | S                |
| Acute infective tracheobronchitis               | 312400008    | 4208810    | Condition | SNOMED        | Clinical Finding | S                |
| Acute laryngitis and/or tracheitis              | 276443001    | 4173027    | Condition | SNOMED        | Clinical Finding | S                |
| Acute toxic tracheobronchitis                   | 233799004    | 4121456    | Condition | SNOMED        | Clinical Finding | S                |
| Acute tracheitis                                | 26650005     | 437903     | Condition | SNOMED        | Clinical Finding | S                |
| Acute tracheitis with obstruction               | 8519009      | 255566     | Condition | SNOMED        | Clinical Finding | S                |
| Acute tracheitis without obstruction            | 64369009     | 4273095    | Condition | SNOMED        | Clinical Finding | S                |
| Acute tracheobronchitis                         | 35301006     | 4148204    | Condition | SNOMED        | Clinical Finding | S                |
| Adenoviral laryngotracheobronchitis             | 71255007     | 4322815    | Condition | SNOMED        | Clinical Finding | S                |
| Adult acute epiglottitis and supraglottitis     | 232433008    | 4051610    | Condition | SNOMED        | Clinical Finding | S                |
| Catarrhal tracheitis                            | 50211006     | 4173594    | Condition | SNOMED        | Clinical Finding | S                |
| Croup                                           | 71186008     | 260134     | Condition | SNOMED        | Clinical Finding | S                |
| Epiglottitis                                    | 80384002     | 4214374    | Condition | SNOMED        | Clinical Finding | S                |
| Haemophilus influenzae epiglottitis             | 58576005     | 4242412    | Condition | SNOMED        | Clinical Finding | S                |
| Haemophilus influenzae laryngotracheobronchitis | 73414003     | 4249017    | Condition | SNOMED        | Clinical Finding | S                |
| Infection causing tracheitis in neonate         | 735740009    | 42536748   | Condition | SNOMED        | Clinical Finding | S                |
| Infectious disorder of trachea                  | 233785003    | 4121450    | Condition | SNOMED        | Clinical Finding | S                |

|                                                      |            |          |           |        |                  |   |
|------------------------------------------------------|------------|----------|-----------|--------|------------------|---|
| Laryngeal obstruction due to supraglottitis          | 3.6491E+13 | 46270516 | Condition | SNOMED | Clinical Finding | S |
| Laryngotracheobronchitis                             | 85915003   | 4312602  | Condition | SNOMED | Clinical Finding | S |
| Parainfluenza virus laryngotracheobronchitis         | 35377009   | 4146838  | Condition | SNOMED | Clinical Finding | S |
| Pediatric acute epiglottitis and supraglottitis      | 232432003  | 4048195  | Condition | SNOMED | Clinical Finding | S |
| Recurrent croup                                      | 2.2951E+13 | 46270340 | Condition | SNOMED | Clinical Finding | S |
| Respiratory syncytial virus laryngotracheobronchitis | 72204002   | 4218289  | Condition | SNOMED | Clinical Finding | S |
| Supraglottitis                                       | 709663002  | 46271527 | Condition | SNOMED | Clinical Finding | S |
| Tracheitis                                           | 62994001   | 4270490  | Condition | SNOMED | Clinical Finding | S |
| Tracheobronchitis                                    | 13617004   | 4028970  | Condition | SNOMED | Clinical Finding | S |
| Viral epiglottitis                                   | 70976000   | 4321233  | Condition | SNOMED | Clinical Finding | S |
| Viral tracheitis                                     | 66011008   | 4278083  | Condition | SNOMED | Clinical Finding | S |
